# Supplementary material for: A core outcome set for neonatal abstinence syndrome: study protocol for a systematic review, parent interviews and a Delphi survey
Source: Springer Nature journal article supplement (doi:10.1186/s13063-016-1666-9), 2016-11-07
Supplement: MOESM1 [file 11029308]

**Appendix 1: Search strategy for systematic review**

Database: Ovid MEDLINE(R) 1946 to Present with Daily Update, Ovid MEDLINE(R) In-Process & Other Non-Indexed Citations <December 22, 2015>

Created by Alanna Marson, Reference and Instruction Librarian, Library and Archives Services, the Hospital for Sick Children

## Search Strategy:

- 
- 1 Neonatal Abstinence Syndrome/ (932)
  - 2 (neonat\* adj3 Abstinence).tw,kf. (514)
  - 3 ((withdraw\* or abstinence) adj3 (substance\* or symptom\* or syndrome\* or drug\* or opioid\* or opiate\*)).tw,kf. (19016)
  - 4 (passive adj3 addiction\*).tw,kf. (15)
  - 5 Substance Withdrawal Syndrome/ (20258)
  - 6 3 or 4 or 5 (32102)
  - 7 (infant\* or infancy or newborn\* or new-born\* or baby\* or babies or neonat\* or toddler\*).mp. (1314214)
  - 8 6 and 7 (1861)
  - 9 1 or 2 or 8 (2326)

4 duplicates removed.

2322 total from Medline.
